# Supplementary material
Source: publisher figshare collection journal article supplement (https://sage.figshare.com/ndownloader/files/18057710)
Supplement: Supplementary file 1 [file 18057710]

## Survey 1: Composition Project

Name: \_\_\_\_\_

Date: \_\_\_\_\_

1. How easy was it to compose a short song by yourself? Circle your answer:

Very Easy – Somewhat Easy – In Between – Difficult – Very Difficult

2. How easy was it to compose a short song with a partner? Circle your answer:

Very Easy – Somewhat Easy – In Between – Difficult – Very Difficult

3. Which do you prefer when composing your own music: a) having guidelines from the teacher, b) having complete creative freedom, or c) having freedom with occasional help from the teacher when needed? Explain your answer.

---

---

---

---

4. Explain how you feel about composing without being given any specific guidelines.

---

---

5. Do you think you would do better with more specific instructions or not? \_\_\_\_\_

---

---

6. How did you feel about choosing your own groups to partner with?

---

---

7. What did you like about our first composition project? \_\_\_\_\_

---

---

8. What did you dislike about our first composition project? \_\_\_\_\_

---

---

9. Which style of learning do you prefer? List in number order with 1 being the most preferred and 5 being the least preferred.

\_\_\_\_\_ Learning a song through teacher instruction to the class (the traditional way).

\_\_\_\_\_ Teaching yourself the written music.

\_\_\_\_\_ Having a friend help you to learn your part.

\_\_\_\_\_ Composing your own music.

\_\_\_\_\_ Composing with a partner.

10. Rate your success level for our first composition project. Circle your answer below:

A) I was not able to complete the assignment.

B) I completed the composition, but just barely. I really struggled with this assignment.

C) I did alright for my first composition, it wasn't great but I am sure I will get better with time.

D) I was able to complete the assignment and I did a pretty good job.

E) I completed the assignment and I am really happy with the composition.

11. Did you enjoy this composition? Explain your answer. \_\_\_\_\_

---

---

12. List two to five songs you would personally like to learn: \_\_\_\_\_

---

---

---

Any Additional Comments? \_\_\_\_\_

---

---

---

## Survey 2: Peer Teaching/Peer Learning Project

Name: \_\_\_\_\_

Date: \_\_\_\_\_

1. How easy was it to learn “Under the Sea” using a student led teaching method? Circle your answer:

Very Easy – Somewhat Easy – In Between – Difficult – Very Difficult

2. Which do you prefer when learning a song: a) Learning it from the teacher (the traditional way),

b) Learning it from peers, or c) a combination of both? Explain your answer.

---

---

---

---

3. Which overall style of learning do you prefer?

List in number order with 1 being the most preferred and 5 being the least preferred.

\_\_\_\_\_ Learning a song through teacher instruction to the class (the traditional way).

\_\_\_\_\_ Teaching yourself the written music.

\_\_\_\_\_ Learning your part from another student who already knows how to play it.

\_\_\_\_\_ Teaching someone else how to play a part.

\_\_\_\_\_ Learning and practicing alongside a partner who knows the same amount that you do.

4. Rate your success level for the “student led learning method.” Circle your answer below:

A) I was not able to complete the assignment.

B) I completed learning or teaching the part, but just barely. I really struggled with this assignment.

C) I did alright, it wasn’t great but I am sure I will get better with time.

D) I was able to complete the assignment and I did a pretty good job.

E) I completed the assignment and I am really happy with the way I learned this piece.

5. List some positive aspects of the student lead learning method. (What did you like about it?)

---

---

---

6. List any negative aspects of the student lead learning method. (What did you dislike about it?)

---

---

---

7. Did you enjoy this learning method? Explain your answer. \_\_\_\_\_

---

---

---

8. Were you a teacher or a learner? \_\_\_\_\_

a) If you were a learner, how well were you able to learn your part?

---

---

b) If you were a teacher, how well were you able to teach your part?

---

---

c) Did you happen to do both learning and teaching? Explain your answer \_\_\_\_\_

---

---

Which methods did you use to teach (or to learn from) your peers? Circle all that apply.

- |                                 |                           |                                      |
|---------------------------------|---------------------------|--------------------------------------|
| a) reading the sheet music      | b) singing the part       | c) clapping the rhythm out           |
| d) demonstrating how to play it | e) listening to the music | f) pointing to the notes on the drum |
| g) listening to how it goes     | h) copying arm movements  | i) other _____                       |

10. Any Additional Comments? \_\_\_\_\_

---

### Survey 3: Student Led Group Project

Name: \_\_\_\_\_

Date: \_\_\_\_\_

1. How easy was the Student Led Group Project? Circle your answer:

Very Easy – Somewhat Easy – In Between – Difficult – Very Difficult

2. Which overall style of learning do you prefer?

(List in number order with 1 being the most preferred and 5 being the least preferred.)

\_\_\_\_\_ Learning a song through teacher instruction to the class (the traditional way).

\_\_\_\_\_ Teaching yourself the written music.

\_\_\_\_\_ Learning your part from another student who already knows how to play it.

\_\_\_\_\_ Teaching someone else how to play a part.

\_\_\_\_\_ Learning and practicing alongside a partner who knows the same amount that you do.

3. Rate your success level for the Student Led Group Project.

Circle your answer below:

A) I was not able to complete the assignment.

B) I completed this project, but just barely. I really struggled with this assignment.

C) I did alright, it wasn't great but I am sure I will get better with time.

D) I was able to complete the assignment and I did a pretty good job.

E) I completed the assignment and I am really happy with the way I learned this piece.

4. List some positive aspects of the group song project. (What did you like about it?)

---

---

---

---

---

5. List any negative aspects of the group song project. (What did you dislike about it?)

---

---

---

---

6. Which methods did your group use to learn their parts? Circle all that apply.

- a) reading the sheet music      b) singing the part      c) clapping the rhythm out  
d) demonstrating how to play it to others      e) listening to the music  
f) pointing to the notes (or keys or strings)      g) listening to a recording of the music  
h) copying arm movements  
i) asking the teacher for help (this includes the practicum students – Mr. \_\_\_\_\_ or Ms. \_\_\_\_\_)  
i) other \_\_\_\_\_

7. In this project you were given the opportunity to learn a song of your choice, in a group of your choice, and you were given the freedom to choose which instrument you would like to play. Please answer the following questions about these opportunities. Circle your answers.

a. I enjoyed the chance to choose my own song.

Not at all – a little – in between – I liked it – I really liked it a lot

b. I enjoyed the opportunity to choose my own group in which to participate.

Not at all – a little – in between – I liked it – I really liked it a lot

c. I enjoyed the opportunity to choose my own instrument.

Not at all – a little – in between – I liked it – I really liked it a lot

d. I enjoyed getting to try out a new instrument in this class (such as guitar, keyboard, or singing).

Not at all - a little - in between – I liked it – I really liked it a lot - I didn't try a new instrument, I played the \_\_\_\_\_.

e. I enjoyed learning new music on my own without a teacher's help unless I requested it.

Not at all – a little – in between – I liked it – I really liked it a lot

f. I felt that I had to work harder to learn my parts than in the traditional (teacher-led) lessons.

Not at all – a little – in between – I liked it – I really liked it a lot

g. I felt that I learned more during this project than I normally do in the traditional (teacher-led) music class.

Not at all – a little – in between – I liked it – I really liked it a lot

h. I felt that this project gave me the opportunity to use some leadership skills.

Not at all – a little – in between – I liked it – I really liked it a lot

8. Did you enjoy this learning method? Explain your answer. \_\_\_\_\_

---

---

---

9. What would make the group song project a better learning experience?

---

---

---

---

10. Any Additional Comments?

---

---

---

---

---

---

---

## Appendix A

### Free Response Answers on Survey 1

**3. Which do you prefer when composing your own music: a) having guidelines from the teacher, b) having complete creative freedom, or c) having freedom with occasional help from the teacher when needed?**

- b) I like having freedom because I can make any chords and I can add lyrics or anything and make it unique.
- b) Because I am an independent person.
- b) I like being me (creative)
- c) I like C because it's true.
- c) So I have freedom but if I need help I can get it.
- a) Having guidelines from the teacher because it gives you an idea of what you're doing.
- c) Because I like to go further and I sometimes need help and I would like help from a teacher!
- c) Because we can make our own song and have teacher input to make it better.
- c) If you ever need help then you can ask the teacher for help.
- a) Because you don't have to make up anything.
- b) Because I'm a creative person.
- c) I think it is having freedom with occasional help from the teacher when.
- a) I want to be told what to do.
- c) I would like to compose my own music, having complete creative freedom, with occasional help from the teacher when needed.
- c) So I know it's good and I'm on the right track making what I'm making.
- b) I like having complete freedom and (being) able to compose what I want to.

**4. Explain how you feel about composing without being given any specific guidelines.**

- I feel great about composing without guidelines.
- It makes it easier for me because I feel creative.
- I love it because I can express my feelings.
- I feel dum. [sic]
- I feel ok.
- I felt ok because I didn't have any trouble.
- It was somewhat easy because there's so many notes and you have to find the right one.
- I feel pretty good. We can be creative and make it our own way.
- It's not easy but it's not impossible.
- Good, easy.
- I feel that I would (do) well at that.
- I think it is easy and hard.
- Confused.
- I feel great because I get to express myself in music instead of words.
- Great, me and \_\_\_\_\_ made a great little piece of music!
- I feel good because then I can do anything.

**5. Do you think you would do better with more specific instructions or not?**

- No, it stresses me out when I have to follow instructions.



No.

No.

Yes.

Nope/Yes.

Yes, because I don't have to think of much.

Maybe.

No because it would be more original.

Yeah, anybody (who?) can follow directions will have it easier.

No, because some people may be confused.

No.

Yes kinda but not.

Yes.

Maybe, if I don't understand something.

No and yes, because I want to make my own but when I can't then I want instructions.

No.

## **6. How did you feel about choosing your own groups to partner with?**

I like it so I can pick someone I can work with.

Felt great not to be controlled.

It's ok, I like being on my own.

I felt ok.

I like it.

I felt great because the music went well with each other.

I like it.

I feel good because it's more ideas we can put together.

It was fine but I would rather work along.

Good, it was easy.

I feel great about that.

I think that was really fun.

Just as bad as having one picked already.

I would like the teachers to pair me up because everyone else instantly picks someone.

Good, me and \_\_\_\_\_ are really good at it!

I feel good because I can choose someone I get along with.

## **7. What did you like about our first composition project?**

I loved it because \_\_\_\_\_ and I worked together amazingly.

Ok because it was only our first time doing it.

I feel it's great.

I liked it a little.

I liked it because we had the freedom to do whatever.

We got to do what we wanted.

It was fun. I would like to write a song and play it.

We got to hear everyone's music.

It was fun because we got to experiment with different notes and instruments.

That when we put it together, it sounded cool.

I felt good – it was fun.

I think it was really fun.  
It was bad but not horrible.  
I loved it when I did it by myself (but when I partnered up it went downhill.)  
Great it sounded the best out of the whole class!  
I liked that we could do anything and do it with anyone.

**8. What did you dislike about our first composition project?**

I didn't dislike anything.  
Not being directed when to start.  
I dislike our beginning.  
How I had to add a new part. (*Felt another student was mean.*)  
I could not incorporate more things into it.  
Nothing.  
That the drum set kids were crazy and loud.  
It was noisy.  
I didn't really like that it was required to work with someone else.  
You had to put specific notes together for it to sound right.  
The person I partnered with.  
\_\_\_\_\_ 's attitude toward the group.  
There was too much.  
Not really.  
Working with a partner.  
Nothing other than it was too easy.  
I disliked that we only had the drums, piano, and African instruments (*i.e. he wanted drum set*).

**11. Did you enjoy this composition? Explain your answer.**

Yes, I liked it because we made a awesome song.  
Yes! It was a great composition concert for the first time.  
Yes, I would like to work alone, but liked working with \_\_\_\_\_.  
No, because No.  
Yes and No.  
Yes, because we got to write our own music.  
Yes I did. It was really fun.  
Yes, because it was fun to make my own music.  
No, it was short and forced into being longer.  
Yes, it was very fun to work with \_\_\_\_\_.  
Yes it was very fun and funny.  
I did enjoy the composition.  
Yes I did. I really enjoyed creating my own music.  
Yes, me and \_\_\_\_\_ made our own music fast and put it together and it sounded good!  
I liked being able to make music I liked.

Additional comments:  
I don't like \_\_\_\_\_. She is mean.  
Steel drums is amazing!  
\_\_\_\_\_ needs to get in trouble.

This is my last year ☹.  
I love steel drums!  
Having a great time with \_\_\_\_\_ in the class!

### Free Response Answers on Survey 2

**2. Which do you prefer when learning a song: a) Learning it from the teacher (the traditional way), b) Learning it from peers, or c) a combination of both? Explain your answer.**

- b) Because I don't like learning it from the teacher.
- c) Both because I enjoy doing it for and by my friends.
- a) She is telling us what to do.
- c) Because maybe someone else practices it wrong.
- b) Because it is easier to learn.
- c) Because if I learn the notes and the rhythm the teacher can help me if I mess up or I don't get the rhythm.
- b) I like it because it's easier to learn.
- a) Because she is saying what to do.
- c) Because I like learning on my own with some feedback on how to make it better.
- c) (Teacher note: no explanation)
- c) My fellow peers might know it and I may not and they can teach me in a way I understand.
- c) The teacher can teach the rhythm and the notes but the other students can teach the best movements to do to play the best.
- b) Because I like learning the song faster.
- c) I prefer learning a song from the teacher and from peers because when the teacher teaches it, you know it's right, and if you need help, your friend can help you.
- a) So I don't have to do much work, but I'll teach a peer.
- b) It's easier because we get to play whenever because we get to know it faster.

**5. List some positive aspects of the student lead learning method. (What did you like about it?)**

- I liked that it didn't take as long.
- Nothing.
- I liked knowing it in a short time.
- I love it.
- I liked how we learned it fast.
- It helps us know how to read, write, and play music by ourselves and with our classmates.
- I liked it because I can learn at my own pace.
- The teacher does not have to do as much work.
- It helps students understand better.
- That I learned the song faster.
- (My peer teacher) taught me in a way I understand.
- There was less stress to get the part right the first time and when teaching it gave a way for more students to connect.
- We all learned it faster.
- I liked that we learned it fast.

It took a shorter amount of time.  
We don't have to wait.

**6. List any negative aspects of the student led learning method. (What did you dislike about it?)**

I didn't like that no people on my drum had done it before on that drum.  
I was alone, nobody helped me and it wasn't fun at all.  
I was on the drum set.  
How there was so much playing (unnecessarily).  
My teacher was bossy.  
Not knowing the rhythm, key signature or when and how long to rest can delay the learning.  
My teacher was too bossy.  
I do not get it when he told me.  
Some of them do not listen.  
None.  
I didn't know the song and I was stressed (teacher note – before learning it).  
It could get distracting very quickly.  
Some kids were annoying.  
Some kids didn't learn anything, they just sat there and did nothing.  
They play around too much.

**7. Did you enjoy this learning method? Explain your answer.**

Yes, because we were able to learn it faster.  
No, because it wasn't fun and nobody helped me.  
The drum set is fun.  
Yes it was really fun.  
Yes.  
Yes. I do, because it helped me learn the music with no distractions and I'm able to ask for help if needed.  
Yes, I loved it because it was very mellow and my pace.  
No, because I like it when the teacher tells you.  
Yes, because we learned faster.  
Yes, \_\_\_\_\_ is a good teacher.  
Yes, it was faster and a lot of fun.  
Yes, because it was faster.  
Yes, I enjoyed it because I got to teach kids how to play their pan.  
Yeah, if they don't play all the time and let me talk.

**8. Were you a teacher or a learner?**

**a) If you were a learner, how well were you able to learn your part?**

I did it pretty well.  
Not at all - no one helped me.  
Pretty easy.  
By seeing someone play the rhythm and learned the notes by the sheet music.  
I learned it fast.  
My classmates helped me with how to rest, and the notes.

It was very easy to learn.  
I was able to learn it alright.  
Pretty good but difficult at first.  
I learned it very quickly because I had the music before (teacher note: a refresher from last year).  
I learned it well.

**b) If you were a teacher, how well were you able to teach your part?**

By notes and rhythm and then let them see me play on the drums.  
I helped my classmates with the notes and how to play them.  
I was able to teach the part to myself very well (*teacher note: it was the electric bass*)  
It was definitely harder to teach than to learn.  
It was pretty easy to teach my pan because \_\_\_\_\_ is a fast learner.  
Easy.

**c) Did you happen to do both learning and teaching? Explain your answer.**

Yes, because I helped my friend learn.  
Yes, I helped with the notes and they helped me with the rests.  
Yes, because I taught myself and learned a little from Mrs. Guzzetta. (*teacher note: electric bass part*).  
Yes, I was taught it then I taught someone else.

**10. Additional Comments:**

Steel drums is amazing!  
This is helping me so much!!

Free Response Answers on Survey 3

**4. Positive aspects of the group song project (what did you like about it?)**

We learned that teamwork makes the team work.  
It gave us a sneak peek into a regular band.  
I was able to work with my friends and  
it helped me learn new instruments.  
I liked that we could choose our own song.  
The way that we all played the music.  
Some of the positives was that we could stay on the same rhythm and we all knew our parts.  
Students were able to play different kinds of instruments, not just the steel drums or drum set.  
Students were able to pick, learn, and play a song together.  
We got to pick our instrument.  
How we played amazing and practice good.  
The song that we picked fitted our group and we could learn at our own pace.  
I liked the song we chose and  
I liked that my group members learned their parts very easily.  
We got to play a song of our choice.  
I liked that we were able to choose who we worked with and how it came along when we played together.

That we as a group played a sort of a good song and finished strong.  
I liked how we got to pick the groups.  
We got to pick a song, work with people, and pick our instruments.

### **5. Negative aspects of the group project (What did you dislike about it?)**

I don't know how to play my instrument.  
We weren't that together.  
That we didn't finish the whole song, just the beginning.  
At first, putting it together was hard.  
Putting it together was hard.  
I really disliked that I didn't know that much of my part and that we were shy.  
The people in my group were a little bossy and didn't let us do our part our way.  
None.  
My group argued about who played what.  
Some students were playing around or not doing their part in the group.  
Some groups didn't practice enough so when it was time to play, it didn't come out so good.  
Some of the students in our group wouldn't practice.  
None.  
I disliked that my group didn't work on it.  
Took a lot of time. Nobody was focused on the project and there was a lot of arguments.  
My team was not following what they're supposed to.  
We did not know our parts.

### **8. Did you enjoy this learning method?**

No because I like it when the teacher teaches us.  
No, I need a pro to tell me how it'd done.  
No, no one pays any attention to the project and just throws it together at the end.  
No, because my group didn't work.  
Yes, because I got to do it without a teacher.  
No I didn't because I didn't get any leadership chances.  
A little – because sometimes it was hard to keep my group on track.  
Yes, because I got to pick my instrument.  
Yes, because we got to pick our song and drum.  
Yes, because I got to learn and understand the music better.  
No I really don't enjoy learning this method because it took me a long time to learn only a little piece.  
Yes, because I got to learn on my own.  
Yes, because I like to do stuff with my group or by myself. I hate people telling me what to do.  
Yes, 'cause you get to learn different note tempos.  
I did because it was fun.  
Not really because I like learning from a teacher.

### **9. What would make the group song project a better learning experience?**

The teacher helping us.  
If everyone actually listened.

Having the teacher a little bit more involved.

Assigning groups would make this project a little better.

A better group. – Can you choose our groups next time?

Having more attention to the student conductor.

I were to practice together.

Listening, practicing more, and not being so stressed trying to get this done on time.

Nothing.

If we had more people and the whole class could play.

Better kids with the same amount of skill, learning together.

All of us knowing our part and not being shy to perform.

Also not being lazy or getting in trouble.

If we had more time to practice and put it together.

Having two people do that same part to make it easier on each other and sound better.

If we played the whole song.

If we were actually able to play together.

Getting more help on my instrument.

## 10. Additional comments:

I'm not really good at picking groups to be in so I usually let the teachers decide. Sometimes I like it, sometimes I don't.

People were playing the drum sets crazy.

## Appendix B

Computing Standard Deviation (x, x-mean of x, x-mean squared)

**Table 1**

### *Order of Learning Method Preferences – Survey 1*

| <u>Teacher</u>   | <u>Teaching yourself written</u> | <u>Peer help</u>    | <u>Composing on own</u> | <u>Composing w/partner</u> |
|------------------|----------------------------------|---------------------|-------------------------|----------------------------|
| 3, -.75, .5625   | 2, -1.3125, 1.72265625           | 5, 2.125, 4.515625  | 1, -1.25, 1.5625        | 4, 1.1875, 1.41015625      |
| 5, 1.25, 1.5625  | 4, .6875, .47265625              | 3, 0.125, .015625   | 1, -1.25, 1.5625        | 2, -.8125, .66015625       |
| 4, .25, .0625    | 5, 1.6875, 2.84765625            | 2, -0.875, .765625  | 3, .75, .5625           | 1, -1.8125, 3.28515625     |
| 5, 1.25, 1.5625  | 4, .6875, .47265625              | 3, 0.125, .015625   | 2, -.25, .0625          | 1, -1.8125, 3.28515625     |
| 1, -2.75, 7.5625 | 2, -1.3125, 1.72265625           | 5, 2.125, 4.515625  | 3, .75, .5625           | 4, 1.1875, 1.41015625      |
| 3, -.75, .5625   | 2, -1.3125, 1.72265625           | 5, 2.125, 4.515625  | 1, -1.25, 1.5625        | 4, 1.1875, 1.41015625      |
| 5, 1.25, 1.5625  | 4, .6875, .47265625              | 3, 0.125, .015625   | 1, -1.25, 1.5625        | 2, -.8125, .66015625       |
| 4, .25, .0625    | 5, 1.6875, 2.84765625            | 3, 0.125, .015625   | 2, -.25, .0625          | 1, -1.8125, 3.28515625     |
| 5, 1.25, 1.5625  | 4, .6875, .47265625              | 2, -0.875, .765625  | 1, -1.25, 1.5625        | 3, .1875, .03515625        |
| 5, 1.25, 1.5625  | 4, .6875, .47265625              | 2, -0.875, .765625  | 1, -1.25, 1.5625        | 3, .1875, .03515625        |
| 5, 1.25, 1.5625  | 4, .6875, .47265625              | 2, -0.875, .765625  | 1, -1.25, 1.5625        | 3, .1875, .03515625        |
| 3, -.75, .5625   | 1, -2.3125, 5.34765625           | 2, -0.875, .765625  | 5, 2.75, 7.5625         | 4, 1.1875, 1.41015625      |
| 5, 1.25, 1.5625  | 4, .6875, .47265625              | 1, -1.875, 3.515625 | 3, .75, .5625           | 2, -.8125, .66015625       |
| 3, -.75, .5675   | 1, -2.3125, 5.34765625           | 2, -0.875, .765625  | 5, 2.75, 7.5625         | 4, 1.1875, 1.41015625      |
| 3, -.75, .5625   | 2, -1.3125, 1.72265625           | 5, 2.125, 4.515625  | 1, -1.25, 1.5625        | 4, 1.1875, 1.41015625      |
| 1, -2.75, 7.5625 | 5, 1.6875, 2.84765625            | 1, -1.875, 3.515625 | 5, 2.75, 7.5625         | 3, .1875, .03515625        |

Totals:

Raw score compiled of all 16 students:

60

53

46

36

45

|                            |         |       |      |         |
|----------------------------|---------|-------|------|---------|
| Mean:                      |         |       |      |         |
| 3.75                       | 3.3125  | 2.875 | 2.25 | 2.8125  |
| Sum of x-the mean squared: |         |       |      |         |
| 29                         | 29.4375 | 29.75 | 37   | 20.4375 |

**Table 2**

***Order of Learning Method Preferences – Survey 2***

| <u>Teacher</u>         | <u>Teaching yourself</u> | <u>Peer learning</u> | <u>Peer Teaching</u> | <u>With someone knows same</u> |
|------------------------|--------------------------|----------------------|----------------------|--------------------------------|
| 5, 2.3125, 5.34765625  | 1, -2.25, 5.0625         | 3, -.375, .140625    | 4, 1.125, 1.265625   | 2, -1.125, 1.265625            |
| 5, 2.3125, 5.34765625  | 1, -2.25, 5.0625         | 4, .625, .390625     | 3, .125, .015625     | 2, -1.125, 1.265625            |
| 2, -0.6875, .47265625  | 5, 1.75, 3.0625          | 1, -2.375, 5.640625  | 4, 1.125, 1.265625   | 3, -.125, .015625              |
| 1, -1.6875, 2.84765625 | 3, -.25, .0625           | 5, 1.625, 2.640625   | 2, -.875, .765625    | 4, .875, .765625               |
| 4, 1.3125, 1.72265625  | 5, 1.75, 3.0625          | 1, -2.375, 5.640625  | 2, -.875, .765625    | 3, -.125, .015625              |
| 4, 1.3125, 1.72265625  | 5, 1.75, 3.0625          | 1, -2.375, 5.640625  | 3, .125, .015625     | 2, -1.125, 1.265625            |
| 1, -1.6875, 2.84765625 | 2, -1.25, 1.5625         | 5, 1.625, 2.640625   | 4, 1.125, 1.265625   | 3, -.125, .015625              |
| 3, .3125, .09765625    | 5, 1.75, 3.0625          | 3, -.375, .140625    | 2, -.875, .765625    | 1, -2.125, 4.515625            |
| 1, -1.6875, 2.84765625 | 5, 1.75, 3.0625          | 5, 1.625, 2.640625   | 5, 2.125, 4.515625   | 5, 1.875, 3.515625             |
| 5, 2.3125, 5.34765625  | 3, -.25, .0625           | 1, -2.375, 5.640625  | 2, -.875, .765625    | 4, .875, .765625               |
| 3, .3125, .09765625    | 5, 1.75, 3.0625          | 4, .625, .390625     | 2, -.875, .765625    | 1, -2.125, 4.515625            |
| 3, .3125, .09765625    | 2, -1.25, 1.5625         | 4, .625, .390625     | 1, -1.875, .765625   | 5, 1.875, 3.515625             |
| 2, -.6875, .47265625   | 1, -2.25, 5.0625         | 4, .625, .390625     | 3, .125, .015625     | 5, 1.875, 3.515625             |
| 2, -.6875, .47265625   | 5, 1.75, 3.0625          | 4, .625, .390625     | 1, -1.875, .765625   | 3, -.125, .015625              |
| 1, -1.6875, 2.84765625 | 2, -1.25, 1.5625         | 5, 1.625, 2.640625   | 3, .125, .015625     | 4, .875, .765625               |
| 1, -1.6875, 2.84765625 | 2, -1.25, 1.5625         | 4, .625, .390625     | 5, 2.125, 4.515625   | 3, -.125, .015625              |

Totals:

Raw score compiled of all 16 students:

|    |    |    |    |    |
|----|----|----|----|----|
| 43 | 52 | 54 | 46 | 50 |
|----|----|----|----|----|

Mean:

|        |      |       |       |       |
|--------|------|-------|-------|-------|
| 2.6875 | 3.25 | 3.375 | 2.875 | 3.125 |
|--------|------|-------|-------|-------|

Sum of x-the mean squared:

|         |    |       |       |       |
|---------|----|-------|-------|-------|
| 35.4375 | 43 | 35.75 | 18.25 | 25.75 |
|---------|----|-------|-------|-------|

**Table 3**

***Order of Learning Method Preferences – Survey 3***

| <u>Teacher</u>         | <u>Teaching yourself</u> | <u>Peer learning</u> | <u>Peer Teaching</u>   | <u>With someone the same</u> |
|------------------------|--------------------------|----------------------|------------------------|------------------------------|
| 5, .9375, .87890625    | 4, .25, .0625            | 3, .5, 6.25          | 1, -1.1875, 1.41015625 | 2, -0.6875, 0.47265625       |
| 5, .9375, .87890625    | 4, .25, .0625            | 1, -1.5, 2.25        | 3, .8125, .66015625    | 2, -0.6875, 0.47265625       |
| 5, .9375, .87890625    | 4, .25, .0625            | 2, -.5, .25          | 3, .8125, .66015625    | 1, -1.6875, 2.84765625       |
| 5, .9375, .87890625    | 4, .25, .0625            | 2, -.5, .25          | 1, -1.1875, 1.41015625 | 3, 0.3125, 0.09765625        |
| 5, .9375, .87890625    | 3, -.75, .5625           | 4, 1.5, 2.25         | 1, -1.1875, 1.41015625 | 2, -0.6875, 0.47265625       |
| 5, .9375, .87890625    | 1, -2.75, 7.5625         | 3, .5, 6.25          | 2, -0.1875, 0.03515625 | 4, 1.3125, 1.72265625        |
| 4, -.0625, .00390625   | 5, 1.25, 1.5625          | 1, -1.5, 2.25        | 2, -0.1875, 0.03515625 | 3, 0.3125, 0.09765625        |
| 4, -.0625, .00390625   | 3, -.75, .5625           | 5, 2.5, 6.25         | 2, -0.1875, 0.03515625 | 1, -1.6875, 2.84765625       |
| 4, -.0625, .00390625   | 5, 1.25, 1.5625          | 3, .5, 6.25          | 1, -1.1875, 1.41015625 | 2, -0.6875, 0.47265625       |
| 3, -1.0625, 1.12890625 | 4, .25, .0625            | 1, -1.5, 2.25        | 5, 2.8125, 7.91015625  | 2, -0.6875, 0.47265625       |
| 3, -1.0625, 1.12890625 | 2, -1.75, 3.0625         | 5, 2.5, 6.25         | 1, -1.1875, 1.41015625 | 4, 1.3125, 1.72265625        |
| 4, -.0625, .00390625   | 5, 1.25, 1.5625          | 2, -.5, .25          | 1, -1.1875, 1.41015625 | 3, 0.3125, 0.09765625        |



|                        |                  |               |                        |                        |
|------------------------|------------------|---------------|------------------------|------------------------|
| 1, -3.0625, 9.37890625 | 5, 1.25, 1.5625  | 2, -.5, .25   | 3, .8125, .66015625    | 4, 1.3125, 1.72265625  |
| 4, -.0625, .00390625   | 5, 1.25, 1.5625  | 2, -.5, .25   | 3, .8125, .66015625    | 1, -1.6875, 2.84765625 |
| 3, -1.0625, 1.12890625 | 3, -.75, .5625   | 1, -1.5, 2.25 | 5, 2.8125, 7.91015625  | 5, 2.3125, 5.34765625  |
| 5, .9375, .87890625    | 2, -1.75, 3.0625 | 3, .5, 6.25   | 1, -1.1875, 1.41015625 | 4, 1.3125, 1.72265625  |

Totals:

|    |    |    |    |    |
|----|----|----|----|----|
| 65 | 60 | 40 | 35 | 43 |
|----|----|----|----|----|

Mean

|        |        |     |        |        |
|--------|--------|-----|--------|--------|
| 4.0625 | 3.7235 | 2.5 | 2.1875 | 2.6875 |
|--------|--------|-----|--------|--------|

Sum of x-mean squared:

|         |        |    |         |         |
|---------|--------|----|---------|---------|
| 18.9375 | 19.875 | 50 | 28.4375 | 23.4375 |
|---------|--------|----|---------|---------|

### Appendix C

#### Explanation of Revision of Data for Figure 10

Survey 2, Question 5:

Which techniques did you use to teach (or learn from) your peers – circle all that apply.

|                                       |              |
|---------------------------------------|--------------|
| a) Reading sheet music                | 11           |
| b) Singing the part                   | 4            |
| c) Clapping out the rhythm            | 0            |
| d) Demonstrating how to play it       | 9            |
| e) <del>Listening to music</del>      | <del>6</del> |
| f) Pointing to the notes on the drum  | 7            |
| g) Listening to how it goes           | 8-(11)       |
| h) Copying arm movements              | 6            |
| i) Other: “My teacher kind of helped” | 1            |

Revision: g and e overlap and are confusing as to which is which. I originally meant for one to be listening to a recording of the original version, and the other to be listening to a student play the song, however, this was not implemented or clarified in the classroom. I will instead combine these two into one. Three students choose both e and g so I will delete three from the final value for a total of 11.
